# Supplementary material
Source: PubMed Central journal article supplement (PMC8843030)
Supplement: NIHMS1775905-supplement-5.pdf [file NIHMS1775905-supplement-5.pdf]

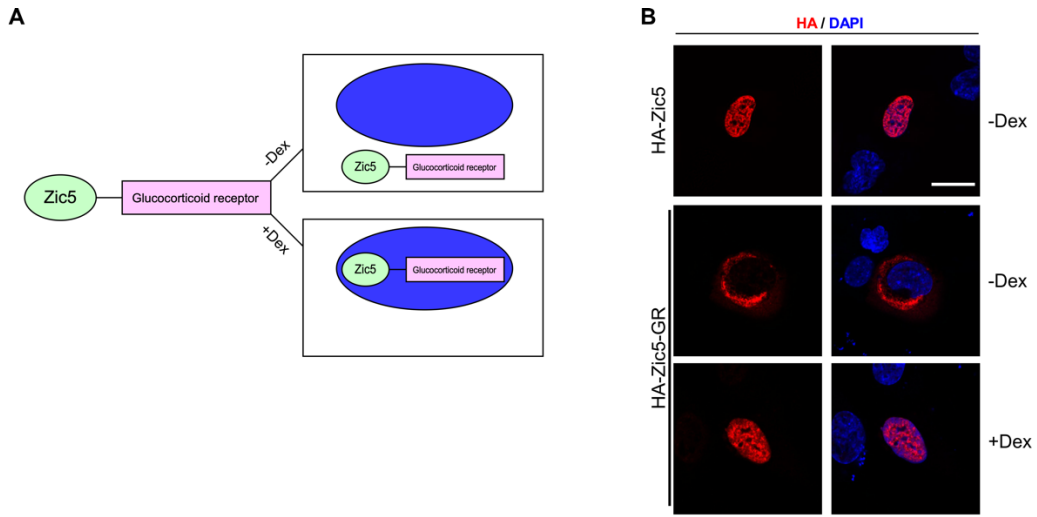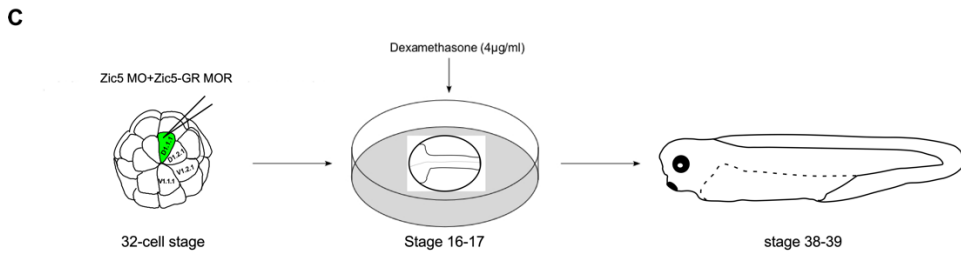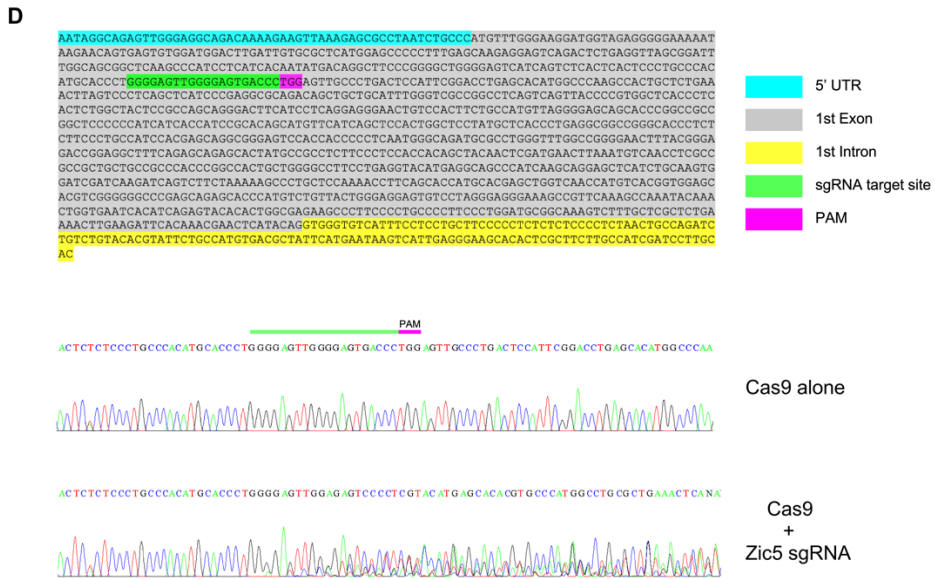

**Figure S1. Related to Figure 1. Inducible Zic5-GR (glucocorticoid receptor) system and rescue experiment workflow.**

(A) Scheme for working model of Zic5-GR fusion construct in cell.

(B) Validation of Zic5-GR construct in hRPE cells. HA-Zic5 localizes in the nuclear while HAZic5-GR shows cytoplasmic retention without dexamethasone treatment. This retention was released upon dexamethasone treatment for 30 min. Scale bar, 20  $\mu$ m.

(C) Scheme for Zic5-GR rescue experiments.

(D) CRISPR/CAS9 targets the first exon of Zic5 gene. The direct sequencing of PCR amplicons shows the genomic DNA of Zic5 was edited by Cas9/Zic5 sgRNA co-injection.

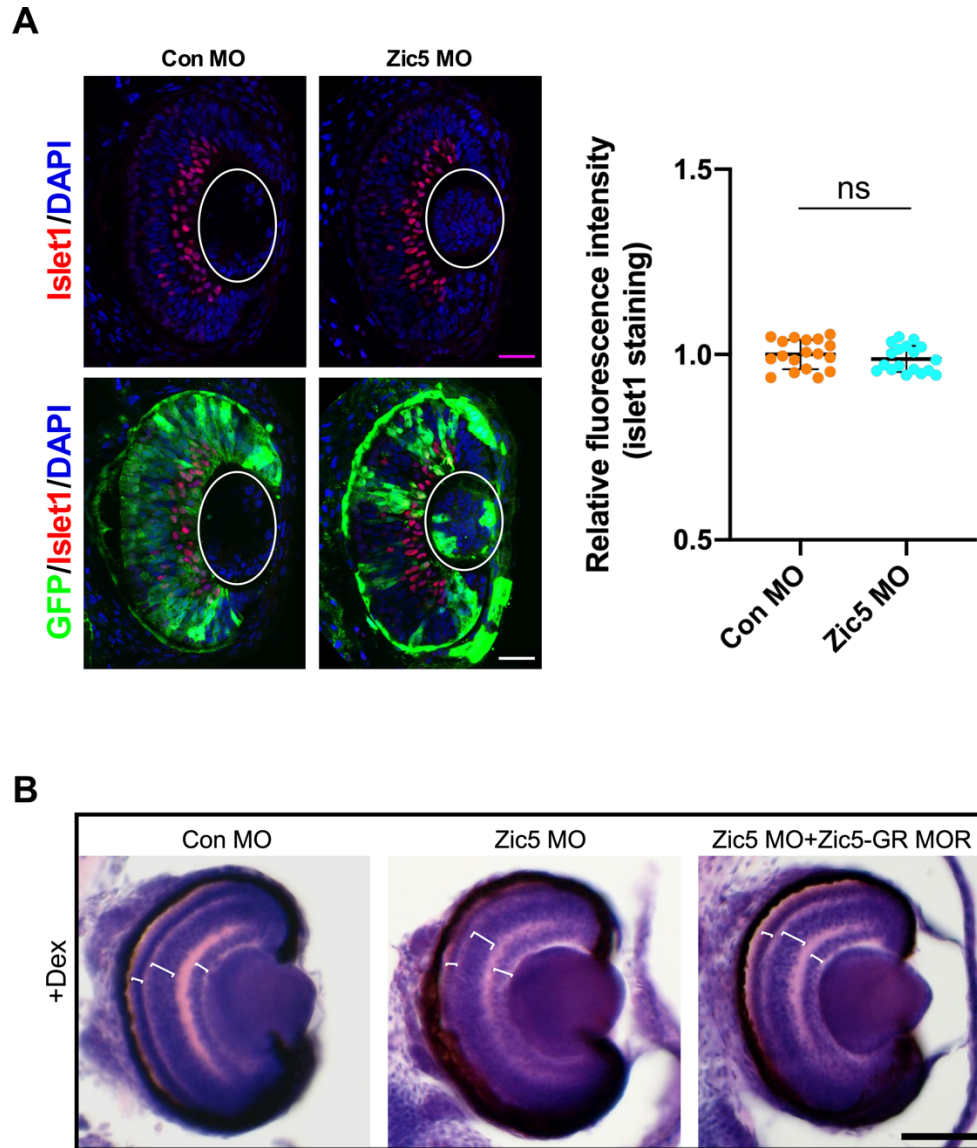

**Figure S2. Related to Figure 2. Zic5 knockdown did not affect inner nuclear layer marker Islet1 expression as well as retina lamination.**

(A) Con MO or Zic5 MO was injected with GFP RNA into the D1.1.1 blastomere at 32 -cell stage. Embryos were sectioned and immunostained with Islet1 antibody at stage 38. Quantification of relative Islet1 fluorescence intensity with unpaired t test, scatterplots represent means  $\pm$  s.d from three biological repeats, ns: no statistical differences between the groups. Scale bar, 40  $\mu$ m.

(B) Section H&E staining of stage 39 eyes injected with indicated morpholino or RNA. Scale bar, 150  $\mu$ m.

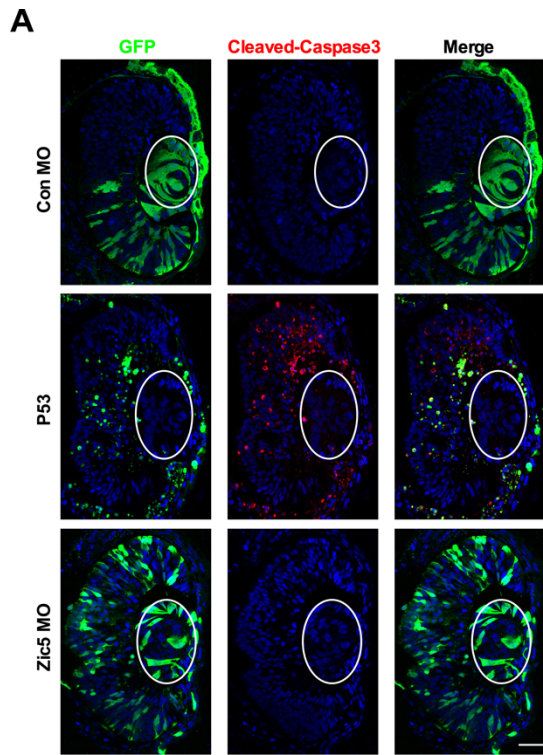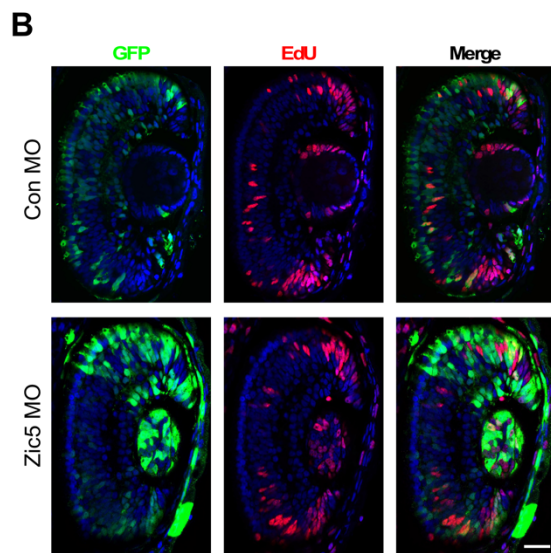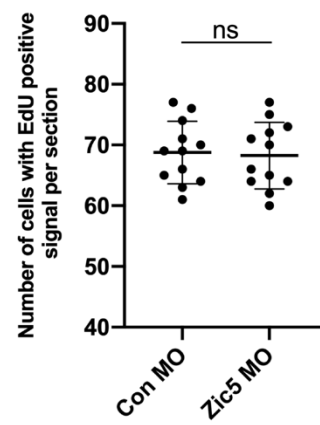

**Figure S3. Related to Figure 2. Knockdown of Zic5 did not induce cell apoptosis or EdU incorporation in the eye.**

(A) Con MO or Zic5 MO was injected with GFP RNA into the D1.1.1 blastomere at 32 -cell stage. Embryos were sectioned and immunostained with cleaved-Caspase3 antibody at stage 37. P53 RNA injection was used as a positive control. Scale bar, 40  $\mu$ m.

(B) Con MO or Zic5 MO was injected with GFP RNA into the D1.1.1 blastomere at 32 -cell stage. Embryos were then injected intra-abdominally EdU (5-ethynyl-2'-deoxyuridine; 1 mM) at stage 37. Three hours after injection, embryos were harvested. Quantification of EdU positive cells in retina with unpaired t test, Scatterplots represent means  $\pm$  s.d from three biological repeats, ns: no statistical differences between the groups. Scale bar, 40  $\mu$ m.

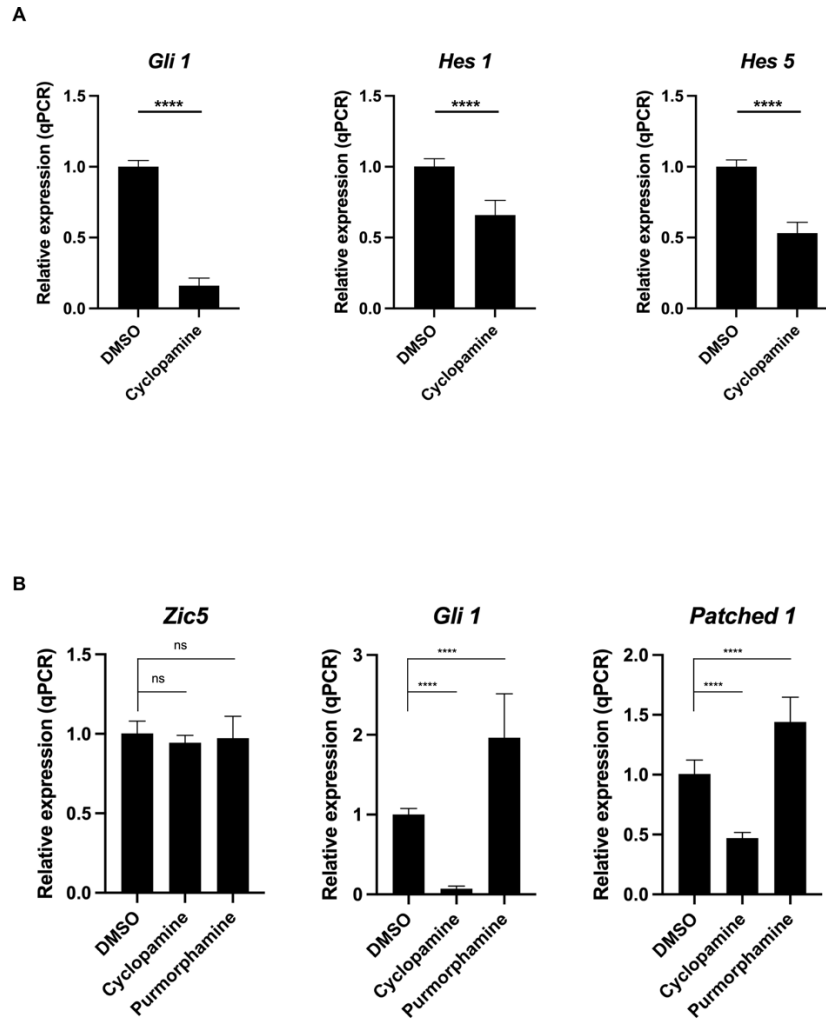

**Figure S4. Related to Figure 3. The expression of *Hes1* and *Hes5* but not *Zic5* was regulated by Hh signal in the developing eyes.**

(A) Embryos were treated with DMSO or cyclopamine from stage 18-19. 40 eyes per group were then dissected at stage 38 for quantitative PCR analysis. Quantification of normalized fold expression of indicated genes with unpaired t test, \*\*\*\*,  $P < 0.0001$ . Histograms represent means  $\pm$  s.d.

(B) Embryos were treated with DMSO or cyclopamine or pumorphamine from stage 18-19. 40 eyes per group were then dissected at stage 38 for quantitative PCR analysis. Quantification of normalized fold expression of indicated genes with one-way ANOVA (Dunnett's multiple comparisons test), \*\*\*\*,  $P < 0.0001$ . Histograms represent means  $\pm$  s.d. ns: no statistical differences between the groups.

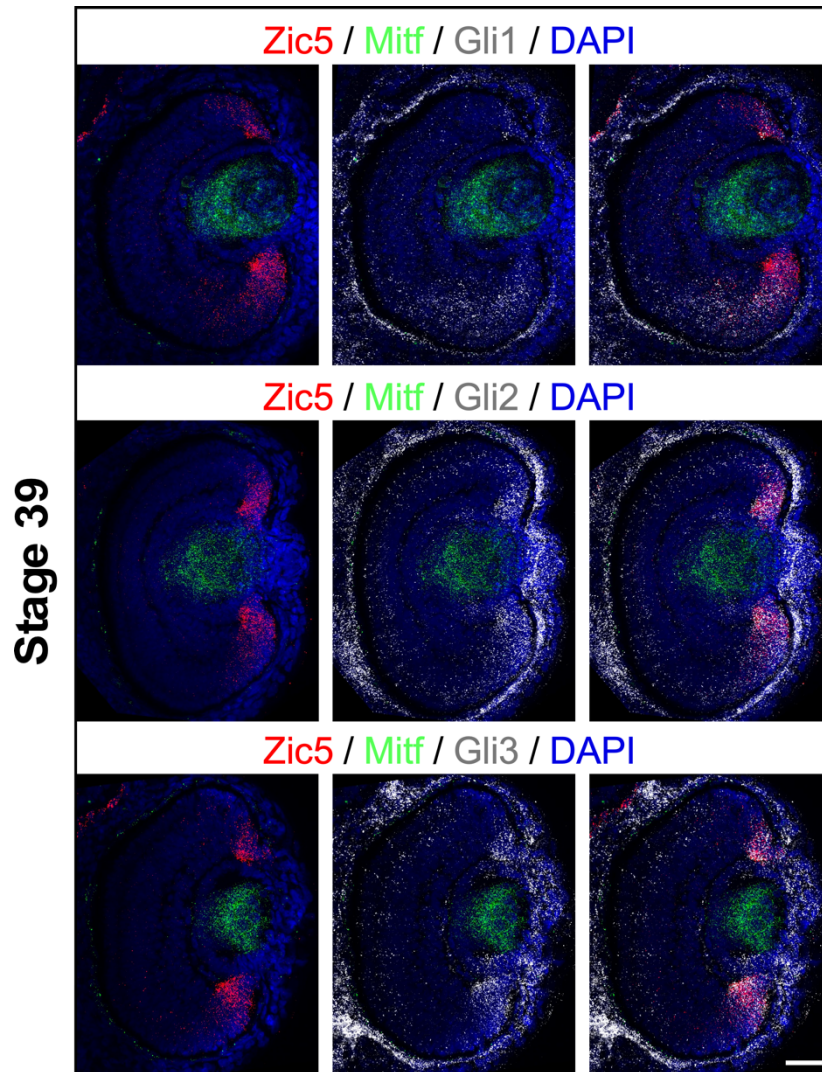

**Figure S5. Related to Figure 4. Expression pattern of Zic5 and Glis in eyes at stage 39.** Section HCR analysis was performed using embryos from stage 39 with indicated probe sets. Mitf probes were used as a RPE marker. Scale bars, 40  $\mu$ m.

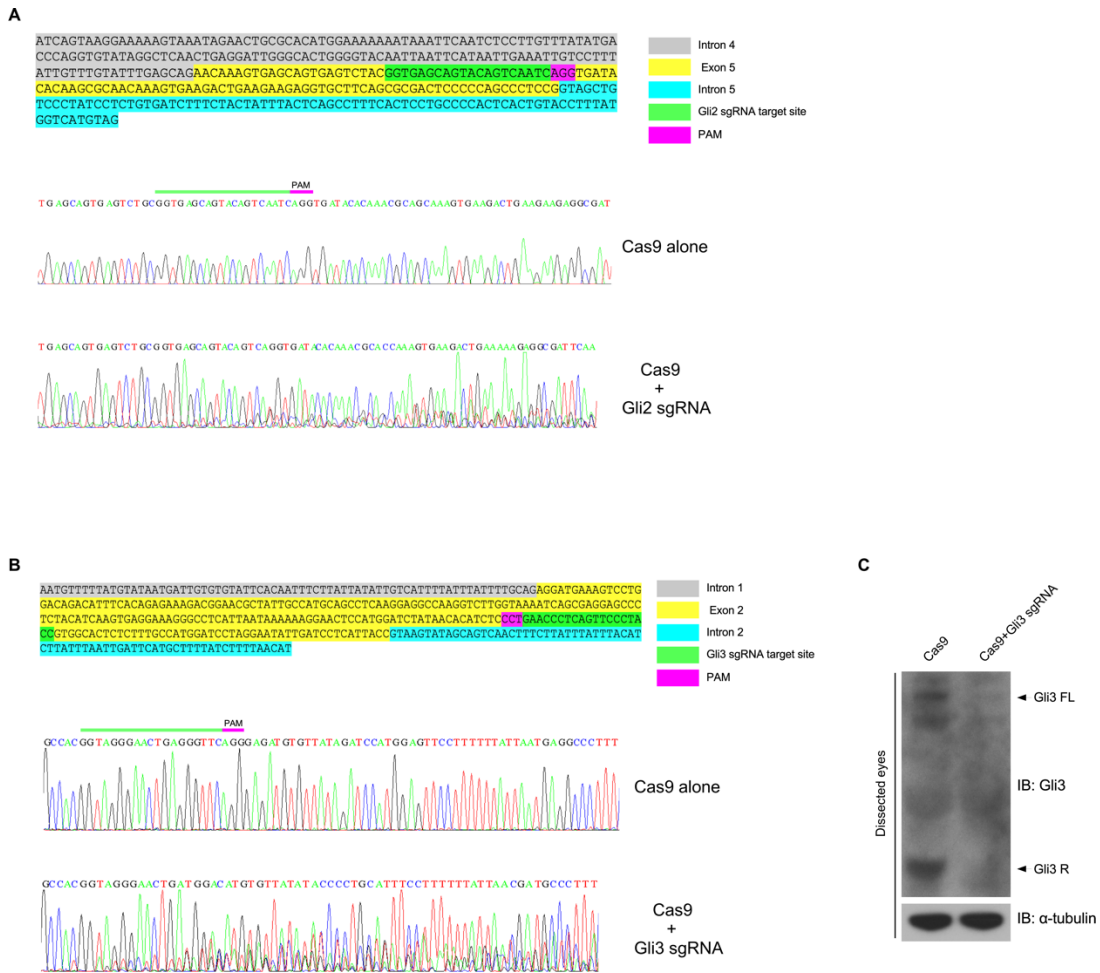

**Figure S6. Related to Figure 4. Gli2 and Gli3 knockout by Cas9/Crispr**

(A) Gli2 sgRNA targets the 5th exon of Gli2 gene. The direct sequencing of PCR amplicons shows the genomic DNA of Gli2 was edited by Cas9/Gli2 sgRNA co-injection.

(B) Gli3 sgRNA targets the 2nd exon of Gli3 gene. The direct sequencing of PCR amplicons shows the genomic DNA of Gli3 was edited by Cas9/Gli3 sgRNA co-injection.

(C) Verification of Gli3 knockout by western blot of endogenous Gli3 protein level.



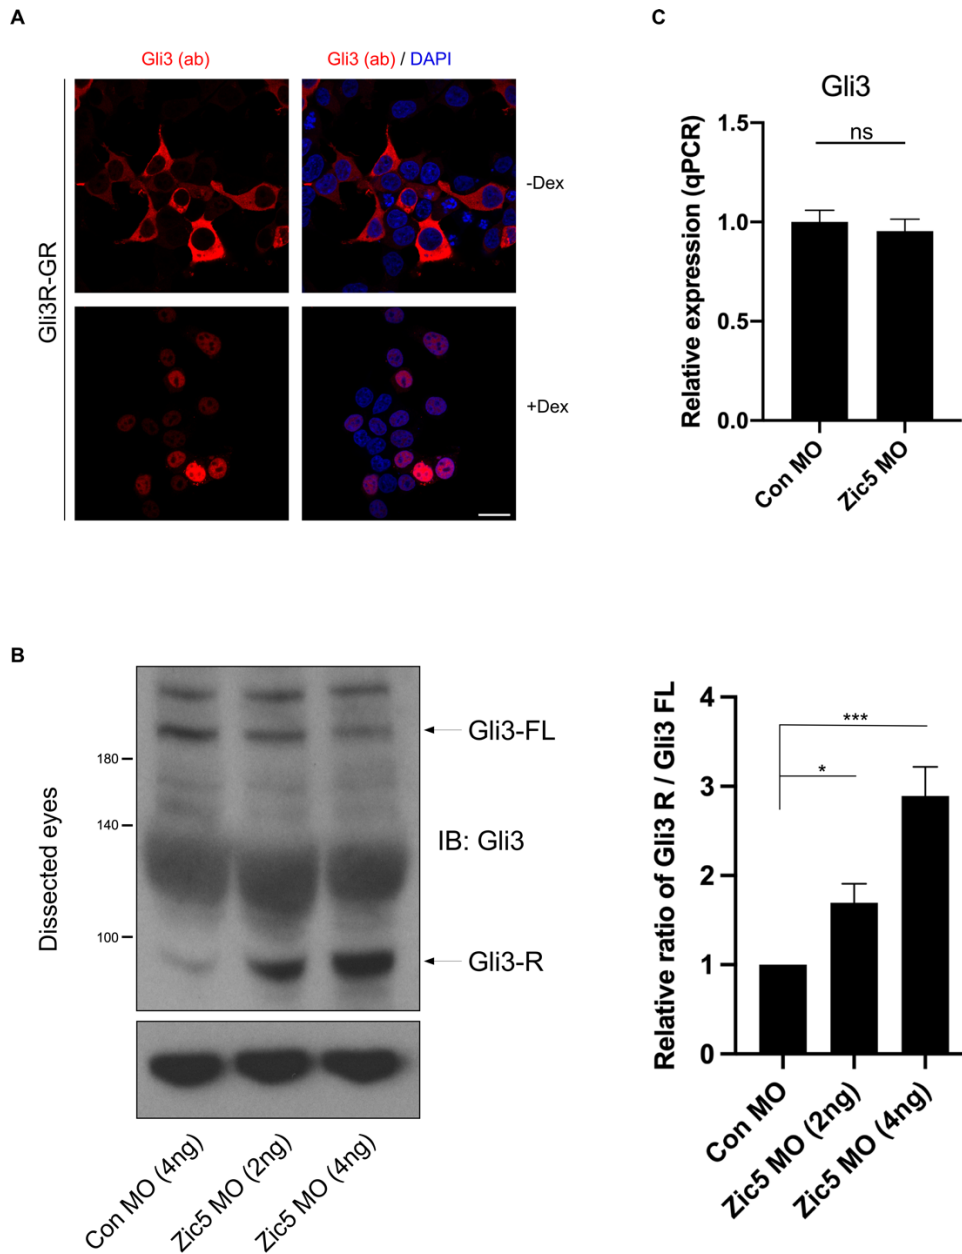

**Figure S7. Related to Figure 4. Zic5 knockdown increases ratio Gli3R/Gli3 FL without affecting Gli3 mRNA level in the eye.**

(A) Validation of Gli3R-GR construct in HEK 293T cells.

(B) Different doses of Zic5 MO were injected into D1.1.1 blastomere at 32-cell stage. Approximately, 46 Eyes were dissected at stage 35, lysed and immunoblotted with anti-Gli3 N-terminal antibody. Quantification of relative ratio of Gli3R/Gli3FL of western bolt with one-way

ANOVA (Dunnett's multiple comparisons test), \*,  $P < 0.05$ , \*\*\*,  $P < 0.001$ . Histograms represent means  $\pm$  s.d from three biological repeats.

(C) Con MO or Zic5 MO was injected into the D1.1.1 blastomere at 32 -cell stage. 40 eyes per group were then dissected at stage 38 for quantitative PCR analysis. Quantification of normalized fold expression of Gli3 with unpaired t test. Histograms represent means  $\pm$  s.d. ns: no statistical differences between the groups.

**Table S1. Real-time RT-PCR primer sequences. Related to STAR Methods.**

| <b>Gene</b> | <b>Sequences</b>                                                 |
|-------------|------------------------------------------------------------------|
| ODC         | F: 5'-GCTTCTGGAGCGGGCAAAGGA-3'<br>R: 5'-CCAAGCTCAGCCCCATGTCA-3'  |
| Gli1        | F: 5'-GCACAAGCCAGCGATCATTT-3'<br>R: 5'-ATCAATGCTGGCATCCGACA-3'   |
| Gli3        | F: 5'-CCCAGCAAAGGGGCTATCAA-3'<br>R: 5'-ATTGCCCTGCCTAACTGAC-3'    |
| Hes1        | F: 5'-GGCATGAACTACCCTACCCAG-3'<br>R: 5'-CACTTTGGCAGCTTCGACTG-3'  |
| Hes5.2      | F: 5'-CATTTCATTCAAATGCGGCAG-3'<br>R: 5'-CTACCATGGCCTCCAAAGACT-3' |
| Patched 1   | F: 5'-CAGCTGCCAGCCGAGGGTA-3'<br>R: 5'-GGGCGAAATTGGCATCGCAGTA-3'  |
| Cyclin D1   | F: 5'-CATCCGCAAACACGCCCAGA-3'<br>R: 5'-GACACTGCCAGCGGCGATCA-3'   |
